# Supplementary material for: Building a Diverse and Equitable Distributed Wind Workforce: A Strategic Approach to Collaborator Selection
Source: Copernicus journal article supplement (doi:10.5194/wes-2024-145), 2024-12-10
Supplement: Supplementary file [file wes-2024-145-RC2-supplement.pdf]

## **Building a Diverse and Equitable Distributed Wind Workforce: A Strategic Approach to Collaborator Selection**

### **Supplement - Feedback**

Line 10 – Suggest looking to the U.S. Energy and Employment Report for wind energy demographic data. Discuss what improvements distributed wind could provide.

Line 55 – I would like to see a discussion if distributed wind has specialized skills (or different from utility scale LBW) that may impact industry and workforce development for these programs.

Line 85 – I'm confused why Development and Siting is after listed after Construction in Figures. Consider putting more professional type phases next to each other?

Figure 2 – How was the question asked to manufacturers different than installers? How much insight would a manufacturer have into construction hiring or development?

Line 115 – Adding a discussion about distributed wind energy demand (current and future employment) may strengthen this discussion. Even empirical information on how many folks are in an installation crew or how many folks are needed for different deployment phases would help add context.

Line 109 – Do you have any information on how different underserved and underrepresented communities could be from those communities where utility-scale LBW is constructed? Present different economic or demographic data. While the power is transferred somewhere else, is it generated at similar locations. How demographically diverse are these communities? Rural populations are underserved and underrepresented communities, but their workforce development may continue to have a smaller impact on the worker demographics. Which parts of increasing diversity and equity would this project have the biggest influence?

Line 110 – what is the definition of “multifunction workers” – workers trained across job or sectors with overlapping skillsets?

Line 125 – is the project objectives DEWWind – maybe add that explicitly?

Line 165 – list dates or administration of EO?

Line 175 – How are registered apprenticeship programs considered? Do you prioritize RAPs to comply with IRA PWA (since it was mentioned as important in the intro?)

Line 240 – Were institutions filtered to include those programs that had a program type that had relevant skillsets for distributed wind energy? If a program has an existing wind programs, how does that apply? Meaning, if there was an existing wind training program within a particular area, should it get plus points?

Line 295 – indication that training development needs to be around installers; but could you also run a specific analysis to understand training program expansion or development for new market areas?
